# Supplementary material for: The Impact of Image Acquisition Parameters and ComBat Harmonization on the Predictive Performance of Radiomics: A Renal Cell Carcinoma Model
Source: PubMed Central journal article supplement (PMC10121203; doi:10.3390/app12199824), 2022-09-29
Supplement: NIHMS1887786-supplement-Table_S1.pdf [file NIHMS1887786-supplement-Table_S1.pdf]

Table S1. Most selected radiomic features in the different approaches.

| Dataset 1 (All)               |                               |                               |
|-------------------------------|-------------------------------|-------------------------------|
| Ori*                          | ComBat-Slice                  | ComBat- Pixel                 |
| <i>Intensity Minimum</i>      | <i>Intensity Maximum</i>      | <i>Intensity Kurtosis</i>     |
| <i>Intensity Skewness</i>     | <i>Intensity PeakPosition</i> | <i>Intensity Uniformity</i>   |
| <i>Intensity PeakPosition</i> | <i>Intensity Minimum</i>      | <i>Intensity Skewness</i>     |
| <i>Intensity Kurtosis</i>     | <i>Intensity Skewness</i>     | <i>Intensity PeakPosition</i> |
| Intensity Skewness            | <i>Intensity Uniformity</i>   | <i>Intensity Maximum</i>      |
| Dataset 2 (AP)                |                               |                               |
| Ori*                          | ComBat-Slice*                 | ComBat- Pixel*                |
| <i>Intensity Minimum</i>      | Intensity Minimum             | Intensity Maximum             |
| Intensity Kurtosis            | Intensity Kurtosis            | Intensity Minimum             |
| Intensity Maximum             | Intensity Maximum             | Intensity Kurtosis            |
| Intensity Skewness            | Intensity Skewness            | Intensity Skewness            |
| Intensity Maximum             | Intensity Maximum             | Intensity Range               |
| Dataset 3 (PVP)               |                               |                               |
| Ori*                          | ComBat-Slice*                 | ComBat- Pixel                 |
| <i>Intensity Minimum</i>      | <i>Intensity Minimum</i>      | <i>Intensity Minimum</i>      |
| <i>Intensity Skewness</i>     | <i>Intensity PeakPosition</i> | <i>Intensity Maximum</i>      |
| <i>Intensity Skewness</i>     | Intensity Uniformity          | <i>Intensity Range</i>        |
| <i>Intensity PeakPosition</i> | Intensity Skewness            | <i>Intensity Skewness</i>     |
| Intensity Maximum             | Intensity Maximum             | <i>Intensity Kurtosis</i>     |

\* Italic bolded features were selected in more than 50% of the runs.
